# Supplementary material
Source: PubMed Central journal article supplement (PMC3791707)
Supplement: 1315784110_pnas.201315784SI.pdf [file 1315784110_pnas.201315784SI.pdf]

# Supporting Information

Stavru et al. 10.1073/pnas.1315784110

## SI Materials and Methods

**Immunofluorescence.** For immunofluorescence, cells were fixed for 10 min in 4% (wt/vol) paraformaldehyde (Electron Microscopy Sciences) in PBS, washed in PBS, permeabilized for 5 min in 0.1% Triton X-100 in PBS, and blocked for at least 30 min in 1% BSA and 10% (vol/vol) goat serum. Primary antibodies were incubated for 60 min in blocking buffer, and unbound antibodies were washed off extensively before a 30-min incubation with DAPI, Phalloidin-488 where applicable, and Alexa-labeled secondary antibodies (Invitrogen) in blocking buffer. Eventually, the coverslips were washed extensively in PBS and mounted in Vectashield (Vector Laboratories). The following primary antibodies were used at the dilutions suggested by the manufacturers: rabbit anti-CoxIV (3E11; Cell Signaling), mouse anti-Drp1 (CT, i.e., against C terminus, 611112; BD Biosciences), rabbit anti-Drp1 (NT, i.e., against N terminus, NB110-55237; Novus Biologicals), mouse anti-Tom20 (clone 29; BD Biosciences), mouse anti-cytochrome *c* (clone 6H2.B4; BD Biosciences), rabbit anti-Mff (HPA010968; Sigma), rabbit anti-Fis1 (ALX210-907-R100; Alexis), and mouse anti HA 6E2 (2367; Cell Signaling). The following antibodies were used in Western blots only (in addition to the antibodies also used for immunofluorescence): mouse anti-actin (A5441; Sigma), mouse anti-tubulin (clone B5.1.2; Sigma), mouse anti-GAPDH (clone 6c5; Abcam), and mouse anti-Opa1 (clone 18; BD Biosciences).

Quantification of fragmented mitochondria in Drp1 knockout cells and upon actin depolymerization was performed as follows: random fields of view were chosen by using the DAPI channel. Cells were counted, and mitochondrial morphology was classified for each cell as elongated or fragmented. Intermediate cases were not considered. At least 150 cells were counted per experiment and  $\geq 3$  independent experiments were performed.

**Live Cell Imaging.** Imaging of live cells was performed with a Zeiss AxioObserver.Z1 inverted fluorescence microscope equipped with an Evolve EM-CCD camera (Photometrics) and a Yokogawa

CSU-X1 spinning disk confocal system. Images were acquired at 37 °C with a 100 $\times$  N.A. 1.4 oil objective by using MetaMorph. Cells were imaged in a single focal plane every 500 ms for up to 10 min for ER-mitochondrial fragmentation experiments and every 2 s for Mff and Drp1 decay experiments. All images were analyzed in Fiji (National Institutes of Health), including adjustment of brightness and contrast, generation of merged images, and addition of scale bars. To examine the decay in fluorescence of Mff-GFP or mCherry-Drp1, the mean fluorescence intensity in a region of interest (ROI) was measured over time by using the ImageJ/Fiji ROI Manager. Live cell imaging of Drp1-GFP was performed on a PerkinElmer spinning disk microscope driven by the Volocity software, fixed samples were analyzed on a Leica SP5 confocal microscope, and images were taken with a 63 $\times$  oil objective.

For the quantification of fragmentations marked by ER-mitochondria contact sites, analysis was restricted to regions of cells where the ER and mitochondria were well resolved, typically the cell periphery. Mitochondrial fragmentations were analyzed in ImageJ/Fiji. A mitochondrial fragmentation was defined as a region of mitochondria that split into two separate fragments and were maintained as two separate fragments in subsequent images. An ER-mitochondrial contact site was defined as a region where the ER crossed over mitochondria (as opposed to merely running parallel to mitochondria). Cells expressing K38A Drp1 or Drp1 siRNA were identified by hyperfused mitochondria. The number of fragmentations that were quantified was as follows: WT:  $n = 69$  from four independent experiments; K38A:  $n = 47$  from three independent experiments; siRNApool:  $n = 34$  from two independent experiments.

**Statistical Analysis.** Results are expressed as means of at least three independent experiments. The error bars represent the SEM. Analysis was performed with two-tailed Student *t* test unless otherwise specified.





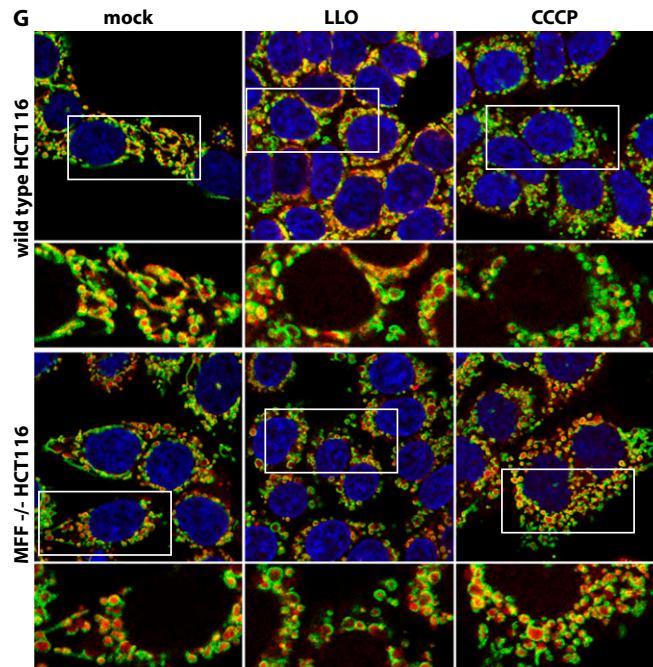

**Fig. S2.** The effect of LLO on Drp1 receptors Fis1 and Mff. (A) HeLa cells were treated for 10 min with 6 nM LLO and stained for Fis1 (green), mitochondria (Mitotracker Deep Red; red), and DAPI (blue). Immunofluorescence images show no detectable decrease in the association of Fis1 with mitochondria. (Scale bar: 10  $\mu\text{m}$ .) (B) Total cell lysates were analyzed by Western blot for Fis1 and GAPDH (loading control), showing that total levels and size of Fis1 are not affected by LLO treatment or infection. (C) Quantitative RT-PCR of Mff mRNA levels using two different sets of primers (MFF 1 and MFF 2), for HeLa cells treated with LLO, carbonyl cyanide m-chlorophenylhydrazone (CCCP), or infected with *Listeria monocytogenes* for 1 h or 3 h. Values are reported relative to the mock-treated cells. (D) Total lysates of cells treated for 10 min with 6 nM LLO in the presence or absence of extracellular calcium or treated for 30 min with 10  $\mu\text{M}$  CCCP or with 1  $\mu\text{M}$  of the calcium ionophore A23187 were analyzed by Western blot for Mff and GAPDH (loading control). (E) Cells were left untreated or pretreated for 1.5 h with 20  $\mu\text{M}$  MG132 and 20  $\mu\text{M}$  lactacystin and then incubated for 10 min with LLO, loaded on a Western blot probed for ubiquitin, Mff, and GAPDH. Note that proteasome inhibition leads to an increase in the ubiquitin signal without preventing Mff degradation. (F) Live-cell analysis of Mff-GFP fluorescence intensity over time in HeLa cells treated with LLO (red traces) or untreated (blue traces), but exposed to the same image acquisition protocol. Each trace represents the mean intensity in a region of interest on an individual cell. Data are normalized to the starting intensity in a given cell. There is negligible photobleaching of GFP under the image acquisition conditions (blue traces). In the red traces, there is little fluorescence decay before addition of LLO, whereas substantial decay starts immediately after addition of LLO and before fragmentation of mitochondria. Data are representative of four independent experiments. (G) Wild-type or Mff<sup>-/-</sup> HCT116 cells were treated with LLO or CCCP for the indicated amount of time and stained with an outer mitochondrial membrane marker (Tom20) and an inner mitochondrial membrane marker (CoxIV). White box indicates 2 $\times$  enlarged region shown below.
